# Supplementary material for: Grape Phylloxera Genetic Structure Reveals Root–Leaf Migration within Commercial Vineyards
Source: MDPI journal article supplement (doi:10.3390/insects12080697), 2021-08-03
Supplement: s1 [file s1]

**Table S1:** List of complete MLGs; Br: Britzingen, Pf: Pfaffenweiler, Ih: Ihringen, Ba: Bahlingen. Sample taken from L: vineyard leaves, R: vineyard roots, T: thicket leaves. From hostplant Vin: *V. vinifera*, RH: rootstock hybrid, FR: fungus resistant variety.

| MLG | n  | location | hostplant | plant code | sample code | PhyllI55 | PhyllI30 | PhyllI36 | DV8     | Dvit6   | DVSSR4  | DV4     |
|-----|----|----------|-----------|------------|-------------|----------|----------|----------|---------|---------|---------|---------|
| 1   | 1  | Br L     | Vin       | 5/139      | Br1         | 127:130  | 132:132  | 195:201  | 143:147 | 202:202 | 251:251 | 210:222 |
| 2   | 1  | Br L     | Vin       | 5/139      | Br3         | 127:130  | 132:132  | 195:201  | 143:145 | 202:205 | 251:251 | 210:222 |
| 3   | 1  | Br L     | Vin       | 4/124      | Br8         | 124:130  | 132:132  | 195:201  | 143:147 | 202:208 | 241:251 | 222:222 |
| 4   | 2  | Br L     | Vin       | 4/124      | Br9         | 127:130  | 132:132  | 195:195  | 143:143 | 202:202 | 241:251 | 219:222 |
|     |    | Br L     | Vin       | 4/124      | Br10        |          |          |          |         |         |         |         |
| 5   | 1  | Br L     | Vin       | 6/127      | Br11        | 124:127  | 129:132  | 195:207  | 143:147 | 202:202 | 251:253 | 216:222 |
| 6   | 2  | Br L     | Vin       | 6/127      | Br12        | 124:127  | 132:132  | 201:207  | 143:145 | 196:202 | 241:241 | 219:222 |
|     |    | Br L     | Vin       | 6/127      | Br14        |          |          |          |         |         |         |         |
| 7   | 4  | Br L     | Vin       | 6/127      | Br13        | 124:124  | 132:132  | 195:195  | 143:145 | 205:208 | 251:251 | 219:222 |
|     |    | Ih R     | RH        | 21/14      | Ih410       |          |          |          |         |         |         |         |
|     |    | Ih R     | RH        | 21/14      | Ih413       |          |          |          |         |         |         |         |
|     |    | Ih R     | RH        | 22/38      | Ih406       |          |          |          |         |         |         |         |
| 8   | 1  | Br L     | Vin       | 6/127      | Br15        | 124:124  | 129:132  | 195:195  | 143:145 | 205:205 | 251:251 | 219:222 |
| 9   | 2  | Br L     | Vin       | 3/135      | Br16        | 127:130  | 129:132  | 195:195  | 145:145 | 202:208 | 251:251 | 222:222 |
|     |    | Br L     | Vin       | 3/135      | Br20        |          |          |          |         |         |         |         |
| 10  | 2  | Br L     | Vin       | 3/135      | Br17        | 130:130  | 132:132  | 195:195  | 145:145 | 196:208 | 241:245 | 210:222 |
|     |    | Br L     | Vin       | 3/135      | Br18        |          |          |          |         |         |         |         |
| 11  | 2  | Br L     | Vin       | 3/135      | Br19        | 130:130  | 129:132  | 195:195  | 145:145 | 196:208 | 241:245 | 210:222 |
|     |    | Br R     | RH        | 3/135      | Br120       |          |          |          |         |         |         |         |
| 12  | 5  | Br L     | Vin       | 7/122      | Br21        | 124:130  | 129:129  | 195:195  | 143:145 | 196:205 | 241:253 | 216:222 |
|     |    | Br L     | Vin       | 7/122      | Br23        |          |          |          |         |         |         |         |
|     |    | Br L     | Vin       | 7/122      | Br25        |          |          |          |         |         |         |         |
|     |    | Br L     | Vin       | 7/122      | Br22        |          |          |          |         |         |         |         |
|     |    | Br L     | Vin       | 7/122      | Br24        |          |          |          |         |         |         |         |
| 13  | 5  | Br L     | Vin       | 4/86       | Br26        | 130:130  | 129:132  | 195:198  | 145:145 | 196:205 | 241:251 | 222:222 |
|     |    | Br L     | Vin       | 4/87       | Br33        |          |          |          |         |         |         |         |
|     |    | Br L     | Vin       | 4/87       | Br32        |          |          |          |         |         |         |         |
|     |    | Br L     | Vin       | 4/87       | Br34        |          |          |          |         |         |         |         |
|     |    | Br L     | Vin       | 4/88       | Br36        |          |          |          |         |         |         |         |
| 14  | 10 | Br L     | Vin       | 4/86       | Br27        | 124:127  | 132:132  | 195:195  | 143:145 | 202:208 | 251:251 | 219:222 |
|     |    | Br L     | Vin       | 4/86       | Br28        |          |          |          |         |         |         |         |
|     |    | Br L     | Vin       | 4/86       | Br30        |          |          |          |         |         |         |         |
|     |    | Br L     | Vin       | 4/87       | Br35        |          |          |          |         |         |         |         |
|     |    | Br L     | Vin       | 4/88       | Br40        |          |          |          |         |         |         |         |
|     |    | Br L     | Vin       | 5/85       | Br51        |          |          |          |         |         |         |         |
|     |    | Br L     | Vin       | 5/85       | Br53        |          |          |          |         |         |         |         |
|     |    | Br L     | Vin       | 5/85       | Br54        |          |          |          |         |         |         |         |
|     |    | Br R     | RH        | 4/87       | Br131       |          |          |          |         |         |         |         |
|     |    | Ih R     | RH        | 23/47      | Ih430       |          |          |          |         |         |         |         |
| 15  | 1  | Br L     | Vin       | 4/86       | Br29        | 124:130  | 129:132  | 195:195  | 145:145 | 208:208 | 241:251 | 210:222 |
| 16  | 4  | Br L     | Vin       | 4/87       | Br31        | 127:127  | 132:132  | 195:195  | 143:145 | 202:208 | 251:253 | 210:219 |
|     |    | Br L     | Vin       | 4/88       | Br39        |          |          |          |         |         |         |         |
|     |    | Br R     | RH        | 4/88       | Br137       |          |          |          |         |         |         |         |
|     |    | Br R     | RH        | 4/88       | Br140       |          |          |          |         |         |         |         |
| 17  | 1  | Br L     | Vin       | 4/88       | Br37        | 124:127  | 129:132  | 195:195  | 143:147 | 202:202 | 251:253 | 216:222 |
| 18  | 4  | Br L     | Vin       | 4/88       | Br38        | 130:130  | 129:132  | 195:195  | 143:145 | 202:208 | 251:251 | 222:222 |
|     |    | Br L     | Vin       | 6/66       | Br45        |          |          |          |         |         |         |         |
|     |    | Br L     | Vin       | 6/67       | Br47        |          |          |          |         |         |         |         |
|     |    | Br L     | Vin       | 6/67       | Br46        |          |          |          |         |         |         |         |
| 19  | 3  | Br L     | Vin       | 6/66       | Br41        | 127:127  | 132:132  | 195:195  | 143:145 | 202:208 | 245:245 | 222:222 |
|     |    | Br L     | Vin       | 6/66       | Br43        |          |          |          |         |         |         |         |
|     |    | Br L     | Vin       | 6/67       | Br48        |          |          |          |         |         |         |         |
| 20  | 1  | Br L     | Vin       | 6/66       | Br42        | 130:130  | 129:132  | 195:195  | 143:145 | 196:208 | 241:251 | 222:222 |
| 21  | 2  | Br L     | Vin       | 6/66       | Br44        | 127:130  | 132:132  | 195:195  | 145:147 | 205:208 | 241:251 | 222:222 |
|     |    | Br L     | Vin       | 6/67       | Br49        |          |          |          |         |         |         |         |
| 22  | 2  | Br L     | Vin       | 5/85       | Br52        | 124:130  | 129:132  | 195:195  | 145:145 | 202:208 | 251:251 | 222:222 |
|     |    | Br R     | RH        | 5/85       | Br151       |          |          |          |         |         |         |         |
| 23  | 1  | Br L     | Vin       | 5/85       | Br55        | 124:124  | 129:132  | 195:195  | 145:145 | 202:208 | 251:251 | 222:222 |
| 24  | 4  | Br L     | Vin       | 5/84       | Br59        | 124:130  | 129:129  | 195:195  | 145:145 | 202:208 | 241:251 | 222:222 |
|     |    | Br L     | Vin       | 5/84       | Br56        |          |          |          |         |         |         |         |
|     |    | Br L     | Vin       | 5/84       | Br58        |          |          |          |         |         |         |         |
|     |    | Br L     | Vin       | 5/84       | Br60        |          |          |          |         |         |         |         |
| 25  | 1  | Br L     | Vin       | 5/53       | Br62        | 124:130  | 132:132  | 195:195  | 143:145 | 196:202 | 251:251 | 222:222 |
| 26  | 3  | Br L     | Vin       | 5/53       | Br63        | 124:124  | 132:132  | 195:207  | 145:145 | 196:202 | 245:251 | 222:222 |
|     |    | Br L     | Vin       | 5/53       | Br65        |          |          |          |         |         |         |         |
|     |    | Br L     | Vin       | 5/53       | Br64        |          |          |          |         |         |         |         |
| 27  | 1  | Br L     | Vin       | 1/142      | Br66        | 127:127  | 132:132  | 195:195  | 145:145 | 202:202 | 241:251 | 219:222 |
| 28  | 4  | Br L     | Vin       | 1/142      | Br67        | 130:130  | 132:132  | 195:195  | 143:147 | 202:205 | 251:253 | 216:222 |

| MLG | n  | location | hostplant | plant code | sample code | PhyllI55 | PhyllI30 | PhyllI36 | DV8     | Dvit6   | DVSSR4  | DV4     |
|-----|----|----------|-----------|------------|-------------|----------|----------|----------|---------|---------|---------|---------|
|     |    | Br L     | Vin       | 1/142      | Br69        |          |          |          |         |         |         |         |
|     |    | Br L     | Vin       | 1/142      | Br68        |          |          |          |         |         |         |         |
|     |    | Br L     | Vin       | 1/142      | Br70        |          |          |          |         |         |         |         |
| 29  | 2  | Br L     | Vin       | 1/79       | Br72        | 124:127  | 132:132  | 195:201  | 145:145 | 202:208 | 241:251 | 210:219 |
|     |    | Br L     | Vin       | 1/79       | Br74        |          |          |          |         |         |         |         |
| 30  | 1  | Br L     | Vin       | 1/79       | Br73        | 127:130  | 132:132  | 195:207  | 143:145 | 202:208 | 251:251 | 222:222 |
| 31  | 1  | Br L     | Vin       | 1/79       | Br75        | 124:130  | 132:132  | 195:195  | 143:145 | 196:205 | 241:245 | 222:222 |
| 32  | 5  | Br L     | Vin       | 4/173      | Br77        | 127:130  | 132:132  | 195:201  | 143:145 | 196:202 | 251:253 | 216:222 |
|     |    | Br L     | Vin       | 4/173      | Br79        |          |          |          |         |         |         |         |
|     |    | Br L     | Vin       | 4/173      | Br76        |          |          |          |         |         |         |         |
|     |    | Br L     | Vin       | 4/173      | Br78        |          |          |          |         |         |         |         |
|     |    | Br L     | Vin       | 4/173      | Br80        |          |          |          |         |         |         |         |
| 33  | 3  | Br L     | Vin       | 4/34       | Br81        | 127:130  | 132:135  | 195:195  | 145:145 | 196:202 | 245:253 | 222:222 |
|     |    | Br L     | Vin       | 4/34       | Br83        |          |          |          |         |         |         |         |
|     |    | Br L     | Vin       | 4/34       | Br85        |          |          |          |         |         |         |         |
| 34  | 2  | Br L     | Vin       | 4/34       | Br82        | 130:130  | 132:132  | 195:195  | 143:143 | 205:205 | 241:251 | 210:222 |
|     |    | Br L     | Vin       | 4/34       | Br84        |          |          |          |         |         |         |         |
| 35  | 4  | Br L     | Vin       | 2/21       | Br87        | 124:130  | 132:132  | 195:195  | 145:147 | 202:208 | 251:251 | 222:222 |
|     |    | Br L     | Vin       | 2/21       | Br89        |          |          |          |         |         |         |         |
|     |    | Br L     | Vin       | 2/21       | Br86        |          |          |          |         |         |         |         |
|     |    | Br L     | Vin       | 2/21       | Br90        |          |          |          |         |         |         |         |
| 36  | 1  | Br L     | Vin       | 2/21       | Br88        | 130:130  | 132:135  | 195:201  | 143:143 | 202:205 | 251:251 | 222:222 |
| 37  | 1  | Br L     | Vin       | 6/65       | Br92        | 124:127  | 129:132  | 195:195  | 143:145 | 196:202 | 241:251 | 222:222 |
| 38  | 1  | Br L     | Vin       | 6/65       | Br94        | 124:127  | 129:132  | 195:195  | 143:145 | 196:205 | 241:251 | 222:222 |
| 39  | 1  | Br R     | RH        | 5/139      | Br104       | 124:130  | 129:132  | 195:201  | 143:145 | 202:208 | 251:251 | 222:222 |
| 40  | 1  | Br R     | RH        | 4/124      | Br106       | 124:127  | 132:132  | 195:201  | 145:147 | 202:202 | 241:253 | 219:222 |
| 41  | 3  | Br R     | RH        | 1/142      | Br168       | 124:127  | 132:132  | 195:201  | 143:145 | 202:202 | 241:253 | 219:222 |
|     |    | Br R     | RH        | 4/124      | Br108       |          |          |          |         |         |         |         |
|     |    | Br R     | RH        | 6/127      | Br113       |          |          |          |         |         |         |         |
| 42  | 17 | Br R     | RH        | 3/135      | Br119       | 124:130  | 129:129  | 195:195  | 145:145 | 196:208 | 241:251 | 222:222 |
|     |    | Br R     | RH        | 4/86       | Br129       |          |          |          |         |         |         |         |
|     |    | Br R     | RH        | 4/87       | Br135       |          |          |          |         |         |         |         |
|     |    | Br R     | RH        | 4/87       | Br132       |          |          |          |         |         |         |         |
|     |    | Br R     | RH        | 4/88       | Br139       |          |          |          |         |         |         |         |
|     |    | Br R     | RH        | 4/88       | Br136       |          |          |          |         |         |         |         |
|     |    | Br R     | RH        | 5/84       | Br157       |          |          |          |         |         |         |         |
|     |    | Br R     | RH        | 5/84       | Br158       |          |          |          |         |         |         |         |
|     |    | Br R     | RH        | 5/85       | Br153       |          |          |          |         |         |         |         |
|     |    | Br R     | RH        | 5/85       | Br154       |          |          |          |         |         |         |         |
|     |    | Br R     | RH        | 6/127      | Br115       |          |          |          |         |         |         |         |
|     |    | Br R     | RH        | 6/127      | Br112       |          |          |          |         |         |         |         |
|     |    | Br R     | RH        | 6/67       | Br149       |          |          |          |         |         |         |         |
|     |    | Br R     | RH        | 6/67       | Br148       |          |          |          |         |         |         |         |
|     |    | Br R     | RH        | 7/122      | Br121       |          |          |          |         |         |         |         |
|     |    | Br R     | RH        | 7/122      | Br123       |          |          |          |         |         |         |         |
|     |    | Br R     | RH        | 7/122      | Br122       |          |          |          |         |         |         |         |
| 43  | 1  | Br R     | RH        | 6/127      | Br114       | 115:124  | 132:132  | 195:201  | 143:145 | 202:208 | 251:251 | 222:222 |
| 44  | 1  | Br R     | RH        | 3/135      | Br116       | 124:130  | 129:129  | 195:195  | 145:145 | 196:208 | 241:251 | 219:222 |
| 45  | 1  | Br R     | RH        | 3/135      | Br118       | 124:130  | 129:129  | 195:195  | 143:145 | 208:208 | 251:251 | 222:222 |
| 46  | 1  | Br R     | RH        | 7/122      | Br124       | 124:130  | 129:129  | 195:195  | 155:155 | 196:208 | 241:251 | 222:222 |
| 47  | 1  | Br R     | RH        | 7/122      | Br125       | 124:130  | 129:129  | 201:201  | 145:145 | 196:208 | 241:251 | 222:222 |
| 48  | 2  | Br R     | RH        | 4/86       | Br126       | 127:130  | 132:132  | 195:195  | 145:145 | 205:205 | 251:253 | 222:222 |
|     |    | Br R     | RH        | 4/86       | Br130       |          |          |          |         |         |         |         |
| 49  | 1  | Br R     | RH        | 4/86       | Br127       | 127:130  | 132:132  | 195:213  | 143:145 | 202:208 | 245:253 | 219:222 |
| 50  | 1  | Br R     | RH        | 4/87       | Br134       | 124:130  | 129:129  | 195:195  | 147:147 | 196:208 | 241:251 | 222:222 |
| 51  | 1  | Br R     | RH        | 4/88       | Br138       | 130:130  | 132:132  | 201:201  | 143:145 | 202:208 | 245:251 | 222:222 |
| 52  | 1  | Br R     | RH        | 6/66       | Br142       | 127:130  | 132:132  | 195:198  | 143:145 | 202:205 | 251:251 | 222:222 |
| 53  | 1  | Br R     | RH        | 6/66       | Br143       | 124:136  | 129:129  | 195:195  | 145:147 | 202:205 | 251:251 | 222:222 |
| 54  | 1  | Br R     | RH        | 6/66       | Br144       | 121:127  | 132:132  | 195:195  | 145:147 | 205:208 | 251:253 | 219:222 |
| 55  | 1  | Br R     | RH        | 6/66       | Br145       | 121:127  | 132:132  | 195:195  | 145:147 | 205:208 | 251:253 | 222:222 |
| 56  | 4  | Br R     | RH        | 5/53       | Br161       | 124:127  | 129:132  | 195:195  | 143:145 | 202:205 | 251:253 | 216:222 |
|     |    | Br R     | RH        | 5/53       | Br163       |          |          |          |         |         |         |         |
|     |    | Br R     | RH        | 5/53       | Br164       |          |          |          |         |         |         |         |
|     |    | Br R     | RH        | 6/67       | Br150       |          |          |          |         |         |         |         |
| 57  | 1  | Br R     | RH        | 5/85       | Br152       | 124:130  | 129:129  | 195:195  | 147:147 | 202:208 | 241:251 | 222:222 |
| 58  | 1  | Br R     | RH        | 5/84       | Br156       | 124:124  | 129:132  | 195:195  | 143:145 | 196:202 | 241:251 | 219:222 |
| 59  | 1  | Br R     | RH        | 5/84       | Br159       | 127:130  | 129:132  | 195:213  | 143:145 | 202:208 | 245:253 | 219:222 |
| 60  | 1  | Br R     | RH        | 5/84       | Br160       | 124:130  | 129:129  | 195:195  | 145:145 | 208:208 | 241:251 | 222:222 |
| 61  | 1  | Br R     | RH        | 5/53       | Br162       | 124:127  | 132:132  | 195:195  | 145:145 | 202:208 | 251:251 | 210:210 |
| 62  | 1  | Br R     | RH        | 5/53       | Br165       | 124:127  | 129:132  | 195:195  | 143:145 | 202:205 | 251:251 | 222:222 |
| 63  | 1  | Br R     | RH        | 1/142      | Br167       | 124:127  | 123:132  | 195:201  | 143:145 | 202:202 | 241:241 | 219:222 |
| 64  | 2  | Br R     | RH        | 1/142      | Br169       | 124:127  | 132:132  | 195:201  | 143:145 | 202:205 | 241:251 | 222:222 |

| MLG | n | location | hostplant | plant code | sample code | PhyllI55 | PhyllI30 | PhyllI36 | DV8     | Dvit6   | DVSSR4  | DV4     |
|-----|---|----------|-----------|------------|-------------|----------|----------|----------|---------|---------|---------|---------|
|     |   | Br R     | RH        | 1/142      | Br170       |          |          |          |         |         |         |         |
| 65  | 1 | Br R     | RH        | 1/79       | Br171       | 124:127  | 132:132  | 195:195  | 143:145 | 187:190 | 233:233 | 201:201 |
| 66  | 2 | Br R     | RH        | 1/79       | Br173       | 124:127  | 132:132  | 195:195  | 143:145 | 202:205 | 251:251 | 222:222 |
|     |   | Br R     | RH        | 1/79       | Br175       |          |          |          |         |         |         |         |
| 67  | 5 | Br R     | RH        | 4/173      | Br177       | 124:127  | 132:132  | 195:195  | 145:147 | 202:208 | 251:253 | 216:222 |
|     |   | Br R     | RH        | 4/173      | Br179       |          |          |          |         |         |         |         |
|     |   | Br R     | RH        | 4/173      | Br176       |          |          |          |         |         |         |         |
|     |   | Br R     | RH        | 4/173      | Br178       |          |          |          |         |         |         |         |
|     |   | Br R     | RH        | 4/173      | Br180       |          |          |          |         |         |         |         |
| 68  | 1 | Br R     | RH        | 8/89       | Br181       | 127:130  | 132:132  | 195:195  | 145:145 | 196:202 | 251:253 | 216:222 |
| 69  | 1 | Br R     | RH        | 8/89       | Br184       | 124:127  | 132:132  | 195:195  | 145:145 | 202:208 | 245:251 | 222:222 |
| 70  | 1 | Br R     | RH        | 8/89       | Br185       | 127:130  | 132:132  | 195:201  | 143:145 | 202:208 | 251:251 | 210:222 |
| 71  | 4 | Pf L     | Vin       | 2/28       | Pf186       | 127:130  | 129:132  | 195:204  | 145:145 | 205:208 | 251:253 | 216:219 |
|     |   | Pf L     | Vin       | 2/28       | Pf187       |          |          |          |         |         |         |         |
|     |   | Pf L     | Vin       | 2/28       | Pf188       |          |          |          |         |         |         |         |
|     |   | Pf L     | Vin       | 2/28       | Pf189       |          |          |          |         |         |         |         |
| 72  | 3 | Pf L     | Vin       | 3/1        | Pf190       | 127:130  | 132:132  | 195:195  | 145:145 | 208:208 | 251:253 | 216:228 |
|     |   | Pf L     | Vin       | 3/1        | Pf191       |          |          |          |         |         |         |         |
|     |   | Pf L     | Vin       | 3/1        | Pf192       |          |          |          |         |         |         |         |
| 73  | 3 | Pf L     | Vin       | 3/1        | Pf193       | 127:130  | 132:132  | 195:195  | 147:147 | 208:208 | 251:253 | 216:228 |
|     |   | Pf L     | Vin       | 3/1        | Pf194       |          |          |          |         |         |         |         |
|     |   | Pf L     | Vin       | 3/1        | Pf195       |          |          |          |         |         |         |         |
| 74  | 1 | Pf L     | Vin       | 2/1        | Pf196       | 127:130  | 132:132  | 195:207  | 143:143 | 205:208 | 251:253 | 216:222 |
| 75  | 3 | Pf L     | Vin       | 2/1        | Pf198       | 130:130  | 129:132  | 195:207  | 143:145 | 202:208 | 251:253 | 216:228 |
|     |   | Pf L     | Vin       | 2/1        | Pf199       |          |          |          |         |         |         |         |
|     |   | Pf L     | Vin       | 2/1        | Pf200       |          |          |          |         |         |         |         |
| 76  | 1 | Pf L     | Vin       | 3/32       | Pf201       | 127:130  | 129:132  | 195:195  | 145:147 | 205:205 | 251:253 | 222:222 |
| 77  | 1 | Pf L     | Vin       | 3/35       | Pf202       | 127:127  | 120:132  | 198:204  | 143:145 | 208:208 | 251:253 | 222:222 |
| 78  | 1 | Pf L     | Vin       | 6/55       | Pf209       | 127:130  | 132:132  | 195:207  | 145:145 | 205:205 | 251:251 | 219:228 |
| 79  | 1 | Pf L     | Vin       | 7/4        | Pf210       | 124:127  | 132:132  | 195:207  | 143:147 | 202:208 | 251:251 | 222:228 |
| 80  | 3 | Pf L     | Vin       | 7/4        | Pf212       | 124:127  | 132:132  | 195:207  | 143:145 | 202:208 | 251:251 | 222:228 |
|     |   | Pf L     | Vin       | 7/4        | Pf213       |          |          |          |         |         |         |         |
|     |   | Pf L     | Vin       | 7/4        | Pf215       |          |          |          |         |         |         |         |
| 81  | 1 | Pf L     | Vin       | 7/4        | Pf214       | 127:127  | 132:132  | 195:207  | 143:145 | 202:208 | 251:251 | 222:228 |
| 82  | 1 | Pf L     | Vin       | 9/21       | Pf216       | 124:130  | 132:132  | 195:207  | 143:145 | 202:205 | 251:253 | 222:222 |
| 83  | 5 | Pf L     | Vin       | 9/21       | Pf217       | 127:130  | 132:132  | 195:207  | 143:143 | 202:205 | 251:251 | 222:222 |
|     |   | Pf R     | RH        | 3/32       | Pf225       |          |          |          |         |         |         |         |
|     |   | Pf R     | RH        | 3/32       | Pf226       |          |          |          |         |         |         |         |
|     |   | Pf R     | RH        | 3/35       | Pf233       |          |          |          |         |         |         |         |
|     |   | Pf R     | RH        | 7/4        | Pf267       |          |          |          |         |         |         |         |
| 84  | 1 | Pf L     | Vin       | 9/21       | Pf218       | 124:130  | 132:132  | 195:207  | 143:145 | 202:205 | 251:253 | 216:222 |
| 85  | 1 | Pf R     | RH        | 2/28       | Pf220       | 127:130  | 132:132  | 204:207  | 145:147 | 202:208 | 245:251 | 216:222 |
| 86  | 2 | Pf R     | RH        | 2/28       | Pf221       | 127:130  | 132:132  | 204:207  | 143:145 | 202:208 | 245:251 | 216:222 |
|     |   | Pf R     | RH        | 2/28       | Pf222       |          |          |          |         |         |         |         |
| 87  | 1 | Pf R     | RH        | 2/28       | Pf223       | 127:130  | 132:132  | 195:207  | 143:143 | 202:202 | 251:251 | 222:222 |
| 88  | 1 | Pf R     | RH        | 2/28       | Pf224       | 130:130  | 132:132  | 195:207  | 143:143 | 202:202 | 251:251 | 222:228 |
| 89  | 1 | Pf R     | RH        | 3/35       | Pf232       | 124:127  | 129:132  | 195:195  | 143:147 | 208:208 | 251:251 | 219:222 |
| 90  | 2 | Pf R     | RH        | 3/35       | Pf234       | 130:130  | 132:132  | 195:195  | 143:143 | 202:205 | 251:251 | 222:228 |
|     |   | Pf R     | RH        | 5/41       | Pf262       |          |          |          |         |         |         |         |
| 91  | 1 | Pf R     | RH        | 3/35       | Pf235       | 127:127  | 129:132  | 195:204  | 143:145 | 205:205 | 251:253 | 216:219 |
| 92  | 3 | Pf R     | RH        | 3/1        | Pf236       | 127:130  | 129:132  | 195:195  | 145:147 | 205:208 | 251:251 | 219:228 |
|     |   | Pf R     | RH        | 7/4        | Pf265       |          |          |          |         |         |         |         |
|     |   | Pf R     | RH        | 7/4        | Pf266       |          |          |          |         |         |         |         |
| 93  | 4 | Pf R     | RH        | 3/1        | Pf237       | 127:130  | 129:132  | 195:195  | 143:145 | 205:208 | 251:251 | 219:228 |
|     |   | Pf R     | RH        | 3/1        | Pf240       |          |          |          |         |         |         |         |
|     |   | Pf R     | RH        | 5/19       | Pf249       |          |          |          |         |         |         |         |
|     |   | Pf R     | RH        | 7/4        | Pf268       |          |          |          |         |         |         |         |
| 94  | 2 | Pf R     | RH        | 3/1        | Pf238       | 130:130  | 129:132  | 195:198  | 145:145 | 205:205 | 251:253 | 222:228 |
|     |   | Pf R     | RH        | 3/1        | Pf239       |          |          |          |         |         |         |         |
| 95  | 4 | Pf R     | RH        | 2/1        | Pf241       | 121:124  | 132:132  | 195:195  | 143:147 | 202:205 | 251:251 | 222:222 |
|     |   | Pf R     | RH        | 2/1        | Pf242       |          |          |          |         |         |         |         |
|     |   | Pf R     | RH        | 2/1        | Pf244       |          |          |          |         |         |         |         |
|     |   | Pf R     | RH        | 2/1        | Pf245       |          |          |          |         |         |         |         |
| 96  | 1 | Pf R     | RH        | 2/1        | Pf243       | 121:124  | 132:132  | 195:195  | 145:149 | 202:205 | 251:251 | 222:222 |
| 97  | 3 | Pf R     | RH        | 6/55       | Pf246       | 127:127  | 129:132  | 195:195  | 145:145 | 202:208 | 251:251 | 222:222 |
|     |   | Pf R     | RH        | 6/55       | Pf247       |          |          |          |         |         |         |         |
|     |   | Pf R     | RH        | 6/55       | Pf248       |          |          |          |         |         |         |         |
| 98  | 2 | Pf R     | RH        | 5/33       | Pf254       | 127:130  | 132:132  | 195:207  | 143:145 | 202:202 | 251:251 | 222:222 |
|     |   | Pf R     | RH        | 5/33       | Pf257       |          |          |          |         |         |         |         |
| 99  | 1 | Pf R     | RH        | 5/33       | Pf256       | 127:130  | 132:132  | 195:207  | 145:145 | 202:202 | 251:251 | 222:222 |
| 100 | 1 | Pf R     | RH        | 5/33       | Pf258       | 127:130  | 132:132  | 195:195  | 143:145 | 202:208 | 251:251 | 219:228 |
| 101 | 1 | Pf R     | RH        | 5/41       | Pf263       | 127:127  | 132:132  | 195:198  | 143:143 | 202:205 | 241:251 | 222:222 |

| MLG | n | location | hostplant | plant code | sample code | PhyllI55 | PhyllI30 | PhyllI36 | DV8     | Dvit6   | DVSSR4  | DV4     |
|-----|---|----------|-----------|------------|-------------|----------|----------|----------|---------|---------|---------|---------|
| 102 | 1 | Pf R     | RH        | 7/4        | Pf264       | 124:130  | 129:132  | 195:195  | 143:145 | 202:202 | 251:251 | 222:222 |
| 103 | 3 | lh T     | RH        | 1/37       | lh271       | 124:127  | 129:132  | 195:195  | 143:145 | 202:208 | 251:251 | 216:216 |
|     |   | lh T     | RH        | 1/37       | lh272       |          |          |          |         |         |         |         |
|     |   | lh T     | RH        | 1/37       | lh273       |          |          |          |         |         |         |         |
| 104 | 2 | lh T     | RH        | 2/24       | lh274       | 124:124  | 120:132  | 195:195  | 143:147 | 205:205 | 251:253 | 222:222 |
|     |   | lh T     | RH        | 2/24       | lh276       |          |          |          |         |         |         |         |
| 105 | 4 | lh T     | RH        | 3/19       | lh277       | 121:124  | 132:132  | 195:207  | 145:145 | 205:205 | 251:251 | 222:222 |
|     |   | lh T     | RH        | 3/19       | lh278       |          |          |          |         |         |         |         |
|     |   | lh T     | RH        | 3/19       | lh280       |          |          |          |         |         |         |         |
|     |   | lh T     | RH        | 3/19       | lh281       |          |          |          |         |         |         |         |
| 106 | 1 | lh T     | RH        | 4/69       | lh282       | 124:127  | 132:132  | 195:195  | 145:145 | 202:208 | 251:251 | 210:228 |
| 107 | 1 | lh T     | RH        | 5/7        | lh285       | 124:130  | 132:132  | 195:195  | 143:143 | 205:208 | 241:251 | 210:216 |
| 108 | 1 | lh T     | RH        | 6/65       | lh291       | 124:130  | 132:132  | 195:198  | 143:145 | 205:208 | 251:251 | 216:216 |
| 109 | 2 | lh T     | RH        | 6/65       | lh292       | 124:130  | 132:132  | 195:195  | 143:147 | 208:208 | 251:251 | 210:222 |
|     |   | lh L     | Vin       | 18/52      | lh344       |          |          |          |         |         |         |         |
| 110 | 1 | lh T     | RH        | 6/65       | lh293       | 130:130  | 129:132  | 195:195  | 143:147 | 202:208 | 251:253 | 216:216 |
| 111 | 1 | lh T     | RH        | 6/65       | lh294       | 127:127  | 132:132  | 195:207  | 143:149 | 202:205 | 245:251 | 216:228 |
| 112 | 1 | lh T     | RH        | 6/65       | lh295       | 124:130  | 129:132  | 195:204  | 143:145 | 202:205 | 251:251 | 210:219 |
| 113 | 1 | lh T     | RH        | 7/3        | lh296       | 124:130  | 129:132  | 195:195  | 143:147 | 205:208 | 251:251 | 216:216 |
| 114 | 1 | lh T     | RH        | 7/3        | lh297       | 124:127  | 132:132  | 195:195  | 143:145 | 208:208 | 245:251 | 222:222 |
| 115 | 1 | lh T     | RH        | 7/3        | lh298       | 124:130  | 123:132  | 195:195  | 145:145 | 202:202 | 251:251 | 222:222 |
| 116 | 1 | lh T     | RH        | 7/3        | lh299       | 130:130  | 129:132  | 195:195  | 149:149 | 202:208 | 251:251 | 219:222 |
| 117 | 1 | lh T     | RH        | 7/3        | lh300       | 130:130  | 129:132  | 195:195  | 147:147 | 202:208 | 251:251 | 219:222 |
| 118 | 1 | lh L     | Vin       | 15/17      | lh328       | 127:130  | 132:132  | 207:207  | 143:143 | 202:202 | 251:251 | 210:228 |
| 119 | 1 | lh L     | Vin       | 15/17      | lh329       | 124:130  | 132:132  | 195:195  | 143:149 | 202:202 | 251:251 | 219:222 |
| 120 | 1 | lh L     | Vin       | 15/17      | lh330       | 124:130  | 132:132  | 195:195  | 145:145 | 205:205 | 251:251 | 216:222 |
| 121 | 1 | lh L     | Vin       | 16/41      | lh331       | 121:130  | 132:132  | 195:210  | 143:149 | 202:208 | 251:253 | 219:222 |
| 122 | 1 | lh L     | Vin       | 16/41      | lh332       | 121:130  | 123:132  | 195:210  | 143:147 | 202:208 | 251:253 | 219:222 |
| 123 | 1 | lh L     | Vin       | 16/41      | lh333       | 130:130  | 132:132  | 195:195  | 145:145 | 202:208 | 251:251 | 216:222 |
| 124 | 1 | lh L     | Vin       | 16/41      | lh334       | 124:127  | 132:132  | 195:213  | 143:145 | 205:205 | 251:253 | 210:222 |
| 125 | 1 | lh L     | Vin       | 16/41      | lh335       | 124:130  | 132:132  | 195:198  | 145:145 | 208:208 | 251:253 | 210:222 |
| 126 | 1 | lh L     | Vin       | 17/26      | lh336       | 127:127  | 132:132  | 195:210  | 143:147 | 208:208 | 251:251 | 210:219 |
| 127 | 1 | lh L     | Vin       | 17/26      | lh340       | 124:127  | 129:132  | 195:195  | 145:147 | 208:208 | 251:253 | 210:219 |
| 128 | 1 | lh L     | Vin       | 18/52      | lh341       | 124:130  | 129:132  | 195:210  | 143:147 | 208:208 | 251:251 | 210:216 |
| 129 | 2 | lh L     | Vin       | 9/21       | lh360       | 130:130  | 132:132  | 195:195  | 145:147 | 202:202 | 251:251 | 222:222 |
|     |   | lh L     | Vin       | 18/52      | lh342       |          |          |          |         |         |         |         |
| 130 | 3 | lh T     | RH        | 10/52      | lh311       | 130:130  | 132:132  | 195:195  | 145:145 | 205:208 | 251:251 | 222:222 |
|     |   | lh T     | RH        | 9/18       | lh306       |          |          |          |         |         |         |         |
|     |   | lh L     | Vin       | 18/52      | lh343       |          |          |          |         |         |         |         |
| 131 | 1 | lh L     | Vin       | 18/52      | lh345       | 124:127  | 132:132  | 195:207  | 145:147 | 202:208 | 251:251 | 219:222 |
| 132 | 1 | lh L     | Vin       | 19/34      | lh348       | 127:130  | 132:132  | 195:213  | 143:145 | 202:208 | 251:253 | 210:216 |
| 133 | 2 | lh L     | Vin       | 10/26      | lh363       | 124:127  | 132:132  | 207:213  | 145:145 | 202:208 | 251:251 | 210:228 |
|     |   | lh L     | Vin       | 19/34      | lh349       |          |          |          |         |         |         |         |
| 134 | 1 | lh L     | Vin       | 8/31       | lh352       | 124:127  | 132:132  | 195:207  | 147:147 | 202:208 | 251:253 | 210:219 |
| 135 | 1 | lh L     | Vin       | 8/31       | lh353       | 127:130  | 132:132  | 195:207  | 145:147 | 208:208 | 251:251 | 210:222 |
| 136 | 1 | lh L     | Vin       | 9/21       | lh357       | 121:130  | 132:132  | 195:195  | 143:145 | 205:208 | 245:251 | 210:219 |
| 137 | 1 | lh L     | Vin       | 9/21       | lh358       | 124:130  | 129:132  | 195:195  | 145:147 | 208:208 | 251:253 | 216:222 |
| 138 | 1 | lh T     | RH        | 8/65       | lh302       | 121:124  | 132:132  | 195:195  | 145:147 | 202:208 | 251:253 | 222:222 |
| 139 | 1 | lh T     | RH        | 8/65       | lh303       | 127:130  | 132:132  | 195:210  | 143:145 | 208:208 | 251:251 | 222:228 |
| 140 | 2 | lh T     | RH        | 8/65       | lh305       | 124:127  | 132:132  | 195:195  | 145:145 | 196:208 | 251:251 | 216:219 |
|     |   | lh T     | RH        | 9/18       | lh307       |          |          |          |         |         |         |         |
| 141 | 1 | lh T     | RH        | 9/18       | lh308       | 121:130  | 132:132  | 195:207  | 145:145 | 202:208 | 251:251 | 210:222 |
| 142 | 1 | lh T     | RH        | 9/18       | lh309       | 124:130  | 132:132  | 195:210  | 147:147 | 202:205 | 251:251 | 210:219 |
| 143 | 1 | lh T     | RH        | 9/18       | lh310       | 130:132  | 123:132  | 195:195  | 145:147 | 205:205 | 251:251 | 210:222 |
| 144 | 1 | lh T     | RH        | 10/52      | lh312       | 130:130  | 120:132  | 195:207  | 145:145 | 202:208 | 251:251 | 210:222 |
| 145 | 1 | lh L     | Vin       | 9/21       | lh359       | 121:124  | 132:132  | 195:195  | 145:145 | 208:208 | 251:251 | 210:228 |
| 146 | 1 | lh L     | Vin       | 10/26      | lh361       | 127:127  | 132:132  | 195:207  | 145:147 | 202:202 | 251:253 | 210:228 |
| 147 | 1 | lh L     | Vin       | 10/26      | lh362       | 124:130  | 132:132  | 195:207  | 145:147 | 202:205 | 251:251 | 216:219 |
| 148 | 1 | lh L     | Vin       | 10/26      | lh364       | 130:130  | 132:132  | 195:204  | 143:145 | 205:208 | 251:251 | 216:222 |
| 149 | 1 | lh L     | Vin       | 10/26      | lh365       | 127:130  | 132:132  | 195:195  | 145:147 | 208:208 | 251:251 | 210:216 |
| 150 | 1 | lh L     | Vin       | 10/26      | lh366       | 124:127  | 129:132  | 195:210  | 145:145 | 202:205 | 251:253 | 210:210 |
| 151 | 1 | lh L     | Vin       | 10/26      | lh367       | 124:130  | 129:132  | 195:195  | 143:145 | 202:208 | 251:251 | 210:216 |
| 152 | 1 | lh R     | RH        | 13/9       | lh378       | 127:130  | 132:132  | 195:195  | 143:147 | 205:208 | 251:253 | 210:222 |
| 153 | 1 | lh R     | RH        | 13/9       | lh379       | 124:124  | 132:132  | 195:207  | 143:145 | 205:208 | 251:251 | 222:222 |
| 154 | 4 | lh R     | RH        | 13/9       | lh380       | 124:124  | 132:132  | 195:210  | 143:145 | 205:208 | 251:251 | 216:219 |
|     |   | lh R     | RH        | 18/63      | lh386       |          |          |          |         |         |         |         |
|     |   | lh R     | RH        | 18/63      | lh387       |          |          |          |         |         |         |         |
|     |   | lh R     | RH        | 18/63      | lh388       |          |          |          |         |         |         |         |
| 155 | 3 | lh R     | RH        | 18/63      | lh389       | 124:127  | 129:132  | 195:195  | 145:147 | 208:208 | 251:251 | 219:228 |
|     |   | lh R     | RH        | 19/24      | lh395       |          |          |          |         |         |         |         |
|     |   | lh R     | RH        | 21/14      | lh405       |          |          |          |         |         |         |         |
| 156 | 1 | lh R     | RH        | 18/63      | lh390       | 124:130  | 132:132  | 195:195  | 143:145 | 205:208 | 245:251 | 210:222 |

| MLG | n | location | hostplant | plant code | sample code | PhyllI55 | PhyllI30 | PhyllI36 | DV8     | Dvit6   | DVSSR4  | DV4     |
|-----|---|----------|-----------|------------|-------------|----------|----------|----------|---------|---------|---------|---------|
| 157 | 1 | lh R     | RH        | 19/24      | lh394       | 124:127  | 129:132  | 195:195  | 143:143 | 205:208 | 245:251 | 219:222 |
| 158 | 3 | lh R     | RH        | 20/3       | lh396       | 124:127  | 132:132  | 195:195  | 145:147 | 208:208 | 251:251 | 219:228 |
|     |   | lh R     | RH        | 21/14      | lh402       |          |          |          |         |         |         |         |
|     |   | lh R     | RH        | 21/14      | lh404       |          |          |          |         |         |         |         |
| 159 | 2 | lh R     | RH        | 20/3       | lh399       | 124:130  | 132:132  | 195:210  | 143:145 | 208:208 | 251:251 | 219:222 |
|     |   | lh R     | RH        | 21/14      | lh401       |          |          |          |         |         |         |         |
| 160 | 1 | lh R     | RH        | 21/14      | lh412       | 124:124  | 132:132  | 195:195  | 143:147 | 205:208 | 251:251 | 219:222 |
| 161 | 1 | lh R     | RH        | 22/38      | lh418       | 121:127  | 132:132  | 195:195  | 143:143 | 202:208 | 241:253 | 216:222 |
| 162 | 1 | lh R     | RH        | 22/38      | lh419       | 124:136  | 123:132  | 195:201  | 143:145 | 202:208 | 251:251 | 210:222 |
| 163 | 1 | lh R     | RH        | 22/38      | lh420       | 130:130  | 132:132  | 195:207  | 143:143 | 202:208 | 241:253 | 216:222 |
| 164 | 1 | lh R     | RH        | 23/47      | lh425       | 124:130  | 120:120  | 195:204  | 143:143 | 202:208 | 241:253 | 216:222 |
| 165 | 1 | lh R     | RH        | 23/47      | lh429       | 124:127  | 132:132  | 195:207  | 143:145 | 202:208 | 251:251 | 216:222 |
| 166 | 1 | lh R     | RH        | 24/62      | lh434       | 124:124  | 132:132  | 195:198  | 143:145 | 202:208 | 251:251 | 219:222 |
| 167 | 1 | lh R     | RH        | 24/62      | lh435       | 127:127  | 120:132  | 195:207  | 143:145 | 202:208 | 251:251 | 219:222 |
| 168 | 1 | lh R     | RH        | 25/16      | lh438       | 124:124  | 120:132  | 195:195  | 143:145 | 202:208 | 251:251 | 219:222 |
| 169 | 2 | lh R     | RH        | 25/16      | lh439       | 124:127  | 132:132  | 195:207  | 143:145 | 205:208 | 251:253 | 216:222 |
|     |   | lh R     | RH        | 25/16      | lh440       |          |          |          |         |         |         |         |
| 170 | 1 | lh T     | RH        | 10/52      | lh314       | 124:127  | 132:132  | 195:207  | 143:149 | 202:205 | 251:251 | 222:222 |
| 171 | 1 | lh T     | RH        | 10/52      | lh315       | 127:130  | 132:132  | 195:195  | 145:147 | 202:205 | 249:249 | 207:216 |
| 172 | 1 | lh L     | Vin       | 10/26      | lh368       | 124:127  | 129:132  | 195:195  | 145:147 | 202:208 | 251:251 | 210:222 |
| 173 | 1 | lh L     | Vin       | 10/26      | lh369       | 124:127  | 132:132  | 195:207  | 145:145 | 208:208 | 251:251 | 210:222 |
| 174 | 1 | lh L     | Vin       | 10/26      | lh370       | 124:130  | 129:132  | 195:195  | 143:143 | 202:205 | 251:251 | 219:222 |
| 175 | 1 | lh L     | Vin       | 11/41      | lh371       | 127:130  | 132:132  | 195:198  | 143:145 | 208:208 | 245:251 | 216:222 |
| 176 | 1 | lh L     | Vin       | 11/41      | lh372       | 124:130  | 132:132  | 195:195  | 147:149 | 202:205 | 251:251 | 210:222 |
| 177 | 1 | lh R     | RH        | 25/16      | lh441       | 124:124  | 132:132  | 195:195  | 145:145 | 205:208 | 251:251 | 210:222 |
| 178 | 1 | lh R     | RH        | 25/16      | lh442       | 127:130  | 132:132  | 195:213  | 143:143 | 205:208 | 241:251 | 216:216 |
| 179 | 1 | lh R     | RH        | 26/40      | lh443       | 124:124  | 129:132  | 195:213  | 143:143 | 205:208 | 241:251 | 216:216 |
| 180 | 1 | lh R     | RH        | 26/40      | lh444       | 124:127  | 132:132  | 195:198  | 147:147 | 205:208 | 245:251 | 222:222 |
| 181 | 1 | lh R     | RH        | 26/40      | lh445       | 124:130  | 132:132  | 198:207  | 143:143 | 205:208 | 241:251 | 216:216 |
| 182 | 1 | lh R     | RH        | 26/40      | lh446       | 124:127  | 132:132  | 195:198  | 143:143 | 205:208 | 241:251 | 216:216 |
| 183 | 1 | lh L     | Vin       | 11/41      | lh373       | 124:130  | 129:132  | 195:195  | 143:145 | 202:202 | 251:253 | 210:222 |
| 184 | 1 | lh R     | RH        | 27/28      | lh447       | 124:130  | 132:132  | 195:213  | 145:145 | 202:208 | 251:251 | 210:219 |
| 185 | 1 | lh R     | RH        | 27/28      | lh450       | 124:130  | 132:132  | 195:213  | 143:143 | 199:202 | 249:249 | 207:213 |
| 186 | 1 | lh L     | Vin       | 11/41      | lh375       | 127:130  | 132:132  | 195:195  | 143:147 | 208:208 | 251:251 | 210:219 |
| 187 | 1 | lh L     | Vin       | 13/14      | lh376       | 124:130  | 132:132  | 195:213  | 145:145 | 205:208 | 251:251 | 210:222 |
| 188 | 1 | lh T     | RH        | 11/64      | lh316       | 127:127  | 129:132  | 195:195  | 145:147 | 205:208 | 251:251 | 222:228 |
| 189 | 1 | lh T     | RH        | 11/64      | lh317       | 124:124  | 129:132  | 195:195  | 145:145 | 202:205 | 251:251 | 216:216 |
| 190 | 1 | lh T     | RH        | 11/64      | lh318       | 121:124  | 129:132  | 198:198  | 143:145 | 202:208 | 251:251 | 210:216 |
| 191 | 1 | lh T     | RH        | 11/64      | lh319       | 121:124  | 132:132  | 195:210  | 145:145 | 205:208 | 251:251 | 222:222 |
| 192 | 1 | lh T     | RH        | 11/64      | lh320       | 124:130  | 129:129  | 195:207  | 145:145 | 202:205 | 251:251 | 210:210 |
| 193 | 1 | lh T     | RH        | 12/37      | lh322       | 130:133  | 132:135  | 195:195  | 143:147 | 202:208 | 245:251 | 216:222 |
| 194 | 1 | lh T     | RH        | 12/37      | lh323       | 127:127  | 132:132  | 195:198  | 143:145 | 202:205 | 245:251 | 216:222 |
| 195 | 1 | lh T     | RH        | 12/37      | lh324       | 124:130  | 132:132  | 195:195  | 143:143 | 208:208 | 251:251 | 216:216 |
| 196 | 1 | lh T     | RH        | 12/37      | lh325       | 124:136  | 129:132  | 192:195  | 147:149 | 205:208 | 253:253 | 216:222 |
| 197 | 1 | lh T     | RH        | 14/43      | lh326       | 127:130  | 132:132  | 195:195  | 147:149 | 202:205 | 251:253 | 210:219 |
| 198 | 1 | lh T     | RH        | 14/43      | lh327       | 124:127  | 129:132  | 195:195  | 145:149 | 202:208 | 251:251 | 222:228 |
| 199 | 1 | Ba T     | RH        | 1/8        | Ba451       | 124:127  | 129:132  | 195:195  | 143:143 | 202:202 | 245:245 | 210:216 |
| 200 | 1 | Ba T     | RH        | 1/8        | Ba453       | 124:130  | 132:132  | 195:207  | 143:143 | 202:202 | 245:245 | 210:216 |
| 201 | 1 | Ba T     | RH        | 1/8        | Ba454       | 124:124  | 129:132  | 195:210  | 143:143 | 202:202 | 245:245 | 210:216 |
| 202 | 1 | Ba T     | RH        | 1/8        | Ba455       | 124:124  | 129:132  | 195:210  | 147:147 | 202:202 | 253:253 | 219:222 |
| 203 | 1 | Ba T     | RH        | 2/34       | Ba457       | 124:124  | 129:132  | 195:210  | 143:145 | 202:202 | 251:251 | 210:222 |
| 204 | 1 | Ba T     | RH        | 2/34       | Ba458       | 124:124  | 129:129  | 195:198  | 147:147 | 202:208 | 245:253 | 210:216 |
| 205 | 1 | Ba T     | RH        | 2/34       | Ba459       | 124:124  | 129:132  | 195:195  | 145:147 | 202:208 | 251:253 | 210:219 |
| 206 | 1 | Ba T     | RH        | 2/34       | Ba460       | 124:124  | 129:132  | 195:195  | 143:145 | 202:205 | 245:251 | 210:213 |
| 207 | 1 | Ba L     | FR        | 3/15       | Ba461       | 124:124  | 129:132  | 195:195  | 145:147 | 202:208 | 253:253 | 222:222 |
| 208 | 1 | Ba L     | FR        | 3/15       | Ba462       | 124:124  | 129:132  | 195:195  | 145:147 | 202:208 | 251:253 | 210:222 |
| 209 | 1 | Ba L     | FR        | 3/15       | Ba464       | 124:136  | 129:132  | 195:195  | 149:149 | 205:208 | 251:255 | 210:216 |
| 210 | 1 | Ba L     | FR        | 4/26       | Ba467       | 124:124  | 132:132  | 195:195  | 143:145 | 202:208 | 251:251 | 219:222 |
| 211 | 1 | Ba L     | FR        | 5/23       | Ba472       | 127:127  | 132:132  | 195:195  | 143:147 | 202:202 | 251:251 | 219:222 |
| 212 | 6 | Ba T     | RH        | 10/2       | Ba496       | 121:127  | 120:132  | 195:198  | 143:145 | 202:205 | 241:245 | 210:216 |
|     |   | Ba T     | RH        | 10/2       | Ba497       |          |          |          |         |         |         |         |
|     |   | Ba T     | RH        | 10/2       | Ba498       |          |          |          |         |         |         |         |
|     |   | Ba L     | FR        | 6/42       | Ba480       |          |          |          |         |         |         |         |
|     |   | Ba T     | RH        | 9/22       | Ba491       |          |          |          |         |         |         |         |
|     |   | Ba T     | RH        | 9/22       | Ba492       |          |          |          |         |         |         |         |
| 213 | 1 | Ba L     | FR        | 7/6        | Ba481       | 127:127  | 132:132  | 195:210  | 143:147 | 202:208 | 251:251 | 210:222 |
| 214 | 1 | Ba L     | FR        | 7/6        | Ba482       | 124:127  | 120:132  | 195:195  | 143:145 | 202:202 | 245:253 | 210:219 |
| 215 | 1 | Ba L     | FR        | 7/6        | Ba484       | 124:130  | 132:132  | 195:195  | 145:147 | 202:208 | 251:251 | 210:222 |
| 216 | 1 | Ba L     | FR        | 8/43       | Ba488       | 124:127  | 132:132  | 195:195  | 143:147 | 202:202 | 241:253 | 222:222 |
| 217 | 1 | Ba L     | FR        | 8/43       | Ba489       | 127:127  | 129:132  | 195:195  | 147:147 | 202:202 | 245:251 | 213:216 |
| 218 | 1 | Ba L     | FR        | 8/43       | Ba490       | 124:127  | 120:132  | 204:210  | 143:145 | 196:202 | 251:251 | 219:219 |
| 219 | 1 | Ba T     | RH        | 10/2       | Ba499       | 124:124  | 129:132  | 198:213  | 145:145 | 202:208 | 251:253 | 210:222 |

| MLG | n | location | hostplant | plant code | sample code | PhyllI55 | PhyllI30 | PhyllI36 | DV8     | Dvit6   | DVSSR4  | DV4     |
|-----|---|----------|-----------|------------|-------------|----------|----------|----------|---------|---------|---------|---------|
| 220 | 1 | Ba T     | RH        | 10/2       | Ba500       | 124:130  | 132:132  | 195:207  | 143:145 | 202:208 | 251:251 | 219:222 |
| 221 | 1 | Ba L     | FR        | 11/16      | Ba501       | 124:124  | 132:132  | 195:195  | 147:147 | 202:202 | 245:253 | 222:222 |
| 222 | 1 | Ba L     | FR        | 11/16      | Ba504       | 121:127  | 129:132  | 195:195  | 145:147 | 202:208 | 251:251 | 222:222 |
| 223 | 1 | Ba L     | FR        | 11/16      | Ba505       | 121:130  | 132:132  | 195:195  | 145:145 | 202:208 | 251:251 | 210:222 |
| 224 | 2 | Ba L     | FR        | 12/65      | Ba506       | 130:130  | 120:132  | 195:195  | 143:147 | 202:205 | 251:253 | 216:222 |
|     |   | Ba L     | FR        | 12/65      | Ba507       |          |          |          |         |         |         |         |
| 225 | 1 | Ba L     | FR        | 12/65      | Ba508       | 124:127  | 132:132  | 195:195  | 147:147 | 202:202 | 251:251 | 222:222 |
| 226 | 1 | Ba L     | FR        | 12/65      | Ba510       | 127:127  | 120:132  | 195:195  | 145:147 | 202:208 | 251:251 | 222:222 |
| 227 | 1 | Ba L     | FR        | 13/45      | Ba512       | 124:124  | 132:132  | 195:210  | 145:147 | 205:208 | 251:251 | 222:222 |
| 228 | 1 | Ba L     | FR        | 13/45      | Ba513       | 127:130  | 120:132  | 195:207  | 143:147 | 202:208 | 245:251 | 216:222 |
| 229 | 4 | Ba L     | FR        | 14/21      | Ba514       | 124:127  | 129:132  | 195:207  | 143:145 | 202:208 | 251:255 | 219:222 |
|     |   | Ba L     | FR        | 14/21      | Ba515       |          |          |          |         |         |         |         |
|     |   | Ba L     | FR        | 14/21      | Ba516       |          |          |          |         |         |         |         |
|     |   | Ba L     | FR        | 14/21      | Ba517       |          |          |          |         |         |         |         |
| 230 | 2 | Ba L     | FR        | 15/38      | Ba519       | 127:127  | 132:132  | 195:195  | 145:145 | 202:202 | 245:253 | 210:222 |
|     |   | Ba L     | FR        | 15/38      | Ba520       |          |          |          |         |         |         |         |
| 231 | 1 | Ba L     | FR        | 16/14      | Ba521       | 124:124  | 132:132  | 195:195  | 145:147 | 202:202 | 251:251 | 222:222 |
| 232 | 1 | Ba L     | FR        | 16/14      | Ba522       | 121:124  | 132:132  | 195:201  | 145:145 | 202:205 | 245:251 | 210:216 |
| 233 | 3 | Ba T     | RH        | 17/82      | Ba523       | 124:127  | 132:132  | 195:195  | 145:147 | 202:202 | 251:251 | 210:219 |
|     |   | Ba T     | RH        | 17/82      | Ba524       |          |          |          |         |         |         |         |
|     |   | Ba T     | RH        | 17/82      | Ba526       |          |          |          |         |         |         |         |
| 234 | 1 | Ba L     | Vin       | 18/36      | Ba528       | 121:124  | 120:132  | 195:195  | 145:145 | 202:202 | 251:251 | 210:219 |
| 235 | 1 | Ba L     | Vin       | 18/36      | Ba529       | 124:127  | 120:132  | 195:207  | 145:145 | 202:208 | 245:245 | 210:222 |
| 236 | 1 | Ba L     | Vin       | 18/36      | Ba532       | 121:124  | 132:132  | 195:198  | 145:145 | 202:208 | 251:251 | 210:222 |
| 237 | 1 | Ba L     | Vin       | 20/41      | Ba536       | 121:124  | 132:132  | 195:198  | 143:143 | 202:208 | 251:251 | 210:222 |
| 238 | 2 | Ba L     | FR        | 21/79      | Ba537       | 124:127  | 129:132  | 195:195  | 145:147 | 202:208 | 245:251 | 210:210 |
|     |   | Ba L     | FR        | 21/79      | Ba540       |          |          |          |         |         |         |         |
| 239 | 1 | Ba L     | FR        | 21/79      | Ba538       | 124:127  | 132:132  | 195:195  | 143:147 | 202:202 | 251:251 | 222:222 |
| 240 | 1 | Ba L     | FR        | 21/79      | Ba539       | 124:127  | 129:129  | 195:195  | 145:147 | 202:208 | 245:251 | 210:210 |
| 241 | 1 | Ba L     | FR        | 22/15      | Ba544       | 124:127  | 132:132  | 195:195  | 145:147 | 202:202 | 251:251 | 219:222 |
| 242 | 1 | Ba L     | FR        | 22/15      | Ba545       | 124:130  | 132:132  | 195:207  | 143:143 | 208:208 | 251:251 | 222:222 |
| 243 | 1 | Ba L     | FR        | 22/15      | Ba546       | 127:127  | 120:132  | 195:198  | 143:145 | 202:202 | 251:253 | 210:222 |
| 244 | 1 | Ba L     | FR        | 23/9       | Ba547       | 121:124  | 132:132  | 195:198  | 143:143 | 202:208 | 251:251 | 222:222 |
| 245 | 1 | Ba L     | FR        | 23/9       | Ba548       | 121:121  | 120:129  | 195:198  | 143:147 | 196:202 | 251:253 | 210:222 |
| 246 | 1 | Ba L     | FR        | 23/9       | Ba549       | 121:124  | 132:132  | 195:198  | 145:145 | 202:208 | 251:251 | 222:222 |
| 247 | 1 | Ba L     | FR        | 24/82      | Ba551       | 127:130  | 132:132  | 195:195  | 145:147 | 202:208 | 251:251 | 222:222 |
| 248 | 1 | Ba L     | FR        | 24/82      | Ba552       | 121:127  | 120:132  | 195:210  | 147:147 | 196:202 | 251:251 | 210:222 |
| 249 | 1 | Ba L     | FR        | 25/64      | Ba556       | 124:127  | 132:132  | 195:195  | 145:147 | 202:202 | 245:251 | 210:216 |
| 250 | 1 | Ba L     | FR        | 25/64      | Ba557       | 124:127  | 132:132  | 195:210  | 145:145 | 196:202 | 251:251 | 219:222 |
| 251 | 1 | Ba L     | FR        | 25/64      | Ba558       | 124:124  | 129:132  | 195:198  | 145:147 | 202:208 | 251:255 | 219:222 |
| 252 | 1 | Ba L     | FR        | 25/64      | Ba560       | 124:127  | 132:132  | 195:198  | 143:147 | 202:202 | 245:251 | 210:222 |
| 253 | 1 | Ba L     | FR        | 26/73      | Ba561       | 124:127  | 132:132  | 195:201  | 143:145 | 205:208 | 251:251 | 210:219 |
| 254 | 1 | Ba L     | FR        | 26/73      | Ba563       | 127:127  | 120:132  | 195:198  | 143:147 | 202:205 | 251:251 | 210:222 |
| 255 | 1 | Ba L     | FR        | 26/73      | Ba564       | 127:127  | 132:132  | 195:195  | 147:149 | 205:208 | 251:251 | 210:222 |
| 256 | 1 | Ba R     | RH        | 18/36      | Ba574       | 124:130  | 132:132  | 195:195  | 143:145 | 202:202 | 251:253 | 222:222 |
| 257 | 1 | Ba R     | RH        | 18/36      | Ba577       | 124:130  | 132:132  | 195:195  | 145:145 | 202:202 | 251:253 | 222:222 |
| 258 | 1 | Ba R     | RH        | 18/36      | Ba578       | 124:127  | 120:120  | 195:195  | 145:145 | 208:208 | 251:255 | 216:216 |
| 259 | 1 | Ba R     | RH        | 21/79      | Ba579       | 124:127  | 129:132  | 195:195  | 143:145 | 202:208 | 245:251 | 210:210 |
| 260 | 1 | Ba R     | RH        | 21/79      | Ba583       | 124:124  | 120:132  | 195:195  | 145:147 | 202:202 | 245:245 | 216:216 |
| 261 | 1 | Ba R     | RH        | 22/15      | Ba584       | 127:127  | 129:132  | 195:195  | 145:147 | 202:202 | 251:253 | 210:222 |
| 262 | 1 | Ba R     | RH        | 27/41      | Ba585       | 121:127  | 132:132  | 195:195  | 145:147 | 202:208 | 245:251 | 216:222 |
| 263 | 1 | Ba R     | RH        | 27/41      | Ba590       | 121:127  | 132:132  | 195:195  | 143:145 | 202:208 | 245:251 | 216:222 |
| 264 | 3 | Br L     | Vin       | 31/19      | Br603       | 127:130  | 132:132  | 195:195  | 143:145 | 202:202 | 251:253 | 222:222 |
|     |   | Br L     | Vin       | 31/19      | Br604       |          |          |          |         |         |         |         |
|     |   | Br L     | Vin       | 31/19      | Br605       |          |          |          |         |         |         |         |
| 265 | 2 | ELP2     | FR        | K1         | B2K652      | 124:127  | 132:132  | 195:207  | 145:145 | 202:205 | 241:251 | 219:222 |
|     |   | ELP2     | FR        | K1         | B2K653      |          |          |          |         |         |         |         |
| 266 | 9 | ELP2     | FR        | K1         | B2K656      | 115:124  | 129:132  | 195:195  | 143:145 | 202:205 | 241:241 | 222:222 |
|     |   | ELP2     | FR        | K1         | B2K658      |          |          |          |         |         |         |         |
|     |   | ELP2     | FR        | K1         | B2K659      |          |          |          |         |         |         |         |
|     |   | ELP2     | FR        | K1         | B2K660      |          |          |          |         |         |         |         |
|     |   | ELP2     | FR        | K1         | B2K661      |          |          |          |         |         |         |         |
|     |   | ELP2     | FR        | K1         | B2K662      |          |          |          |         |         |         |         |
|     |   | ELP2     | FR        | K1         | B2K663      |          |          |          |         |         |         |         |
|     |   | ELP2     | FR        | K1         | B2K664      |          |          |          |         |         |         |         |
| 267 | 9 | ELP2     | FR        | K3         | B2K699      | 124:127  | 120:132  | 195:195  | 143:145 | 205:205 | 241:251 | 219:222 |
|     |   | ELP2     | FR        | K3         | B2K706      |          |          |          |         |         |         |         |
|     |   | OLP2     | FR        | O          | B2K666      |          |          |          |         |         |         |         |
|     |   | OLP2     | FR        | O          | B2K667      |          |          |          |         |         |         |         |
|     |   | OLP2     | FR        | O          | B2K668      |          |          |          |         |         |         |         |
|     |   | OLP2     | FR        | O          | B2K669      |          |          |          |         |         |         |         |

| MLG | n  | location | hostplant | plant code | sample code | PhyllI55 | PhyllI30 | PhyllI36 | DV8     | Dvit6   | DVSSR4  | DV4     |
|-----|----|----------|-----------|------------|-------------|----------|----------|----------|---------|---------|---------|---------|
|     |    | OLP2     | FR        | O          | B2K670      |          |          |          |         |         |         |         |
|     |    | OLP2     | FR        | O          | B2K671      |          |          |          |         |         |         |         |
|     |    | OLP2     | FR        | O          | B2K672      |          |          |          |         |         |         |         |
| 268 | 9  | ELP2     | FR        | K3         | B2K708      | 124:127  | 132:132  | 195:195  | 143:145 | 202:205 | 251:253 | 216:222 |
|     |    | OLP2     | FR        | O          | B2K673      |          |          |          |         |         |         |         |
|     |    | OLP2     | FR        | O          | B2K674      |          |          |          |         |         |         |         |
|     |    | OLP2     | FR        | O          | B2K675      |          |          |          |         |         |         |         |
|     |    | OLP2     | FR        | O          | B2K676      |          |          |          |         |         |         |         |
|     |    | OLP2     | FR        | O          | B2K678      |          |          |          |         |         |         |         |
|     |    | OLP2     | FR        | O          | B2K679      |          |          |          |         |         |         |         |
|     |    | OLP2     | FR        | O          | B2K680      |          |          |          |         |         |         |         |
|     |    | OLP2     | FR        | O          | B2K710      |          |          |          |         |         |         |         |
| 269 | 1  | OLP2     | FR        | O          | B2K677      | 124:127  | 132:132  | 195:195  | 143:145 | 202:208 | 253:253 | 216:222 |
| 270 | 1  | ELP2     | FR        | K2         | B2K681      | 115:124  | 132:132  | 195:195  | 143:145 | 205:208 | 251:253 | 216:222 |
| 271 | 13 | ELP2     | FR        | K2         | B2K682      | 115:124  | 132:132  | 195:195  | 143:145 | 205:208 | 251:253 | 210:222 |
|     |    | ELP2     | FR        | K2         | B2K683      |          |          |          |         |         |         |         |
|     |    | ELP2     | FR        | K2         | B2K684      |          |          |          |         |         |         |         |
|     |    | ELP2     | FR        | K2         | B2K685      |          |          |          |         |         |         |         |
|     |    | ELP2     | FR        | K2         | B2K686      |          |          |          |         |         |         |         |
|     |    | ELP2     | FR        | K2         | B2K687      |          |          |          |         |         |         |         |
|     |    | ELP2     | FR        | K2         | B2K688      |          |          |          |         |         |         |         |
|     |    | ELP2     | FR        | K2         | B2K689      |          |          |          |         |         |         |         |
|     |    | ELP2     | FR        | K2         | B2K690      |          |          |          |         |         |         |         |
|     |    | ELP2     | FR        | K2         | B2K691      |          |          |          |         |         |         |         |
|     |    | ELP2     | FR        | K2         | B2K692      |          |          |          |         |         |         |         |
|     |    | ELP2     | FR        | K2         | B2K693      |          |          |          |         |         |         |         |
|     |    | ELP2     | FR        | K2         | B2K694      |          |          |          |         |         |         |         |
| 272 | 1  | ELP2     | FR        | K3         | B2K696      | 115:124  | 132:132  | 195:195  | 145:145 | 208:208 | 253:253 | 216:222 |
| 273 | 1  | OLP2     | FR        | O          | B2K709      | 124:130  | 132:132  | 195:195  | 143:145 | 202:208 | 253:253 | 216:222 |
| 274 | 14 | ELP1     | FR        | K1         | B1K711      | 127:130  | 120:132  | 195:195  | 145:147 | 202:208 | 253:253 | 222:222 |
|     |    | ELP1     | FR        | K1         | B1K713      |          |          |          |         |         |         |         |
|     |    | ELP1     | FR        | K1         | B1K714      |          |          |          |         |         |         |         |
|     |    | ELP1     | FR        | K1         | B1K715      |          |          |          |         |         |         |         |
|     |    | ELP1     | FR        | K1         | B1K716      |          |          |          |         |         |         |         |
|     |    | ELP1     | FR        | K1         | B1K717      |          |          |          |         |         |         |         |
|     |    | ELP1     | FR        | K1         | B1K718      |          |          |          |         |         |         |         |
|     |    | ELP1     | FR        | K1         | B1K719      |          |          |          |         |         |         |         |
|     |    | ELP1     | FR        | K1         | B1K720      |          |          |          |         |         |         |         |
|     |    | ELP1     | FR        | K1         | B1K721      |          |          |          |         |         |         |         |
|     |    | ELP1     | FR        | K1         | B1K722      |          |          |          |         |         |         |         |
|     |    | ELP1     | FR        | K1         | B1K723      |          |          |          |         |         |         |         |
|     |    | ELP1     | FR        | K1         | B1K724      |          |          |          |         |         |         |         |
|     |    | ELP1     | FR        | K1         | B1K725      |          |          |          |         |         |         |         |
| 275 | 7  | ELP1     | FR        | K2         | B1K726      | 124:127  | 132:132  | 195:195  | 145:147 | 202:202 | 251:253 | 210:222 |
|     |    | ELP1     | FR        | K2         | B1K727      |          |          |          |         |         |         |         |
|     |    | ELP1     | FR        | K2         | B1K728      |          |          |          |         |         |         |         |
|     |    | ELP1     | FR        | K2         | B1K733      |          |          |          |         |         |         |         |
|     |    | ELP1     | FR        | K2         | B1K734      |          |          |          |         |         |         |         |
|     |    | ELP1     | FR        | K2         | B1K735      |          |          |          |         |         |         |         |
|     |    | ELP1     | FR        | K2         | B1K877      |          |          |          |         |         |         |         |
| 276 | 6  | ELP1     | FR        | K2         | B1K729      | 121:124  | 132:132  | 195:207  | 143:145 | 202:208 | 251:251 | 222:222 |
|     |    | ELP1     | FR        | K2         | B1K730      |          |          |          |         |         |         |         |
|     |    | ELP1     | FR        | K2         | B1K731      |          |          |          |         |         |         |         |
|     |    | ELP1     | FR        | K2         | B1K732      |          |          |          |         |         |         |         |
|     |    | ELP1     | FR        | K2         | B1K875      |          |          |          |         |         |         |         |
|     |    | ELP1     | FR        | K2         | B1K876      |          |          |          |         |         |         |         |
| 277 | 1  | OLP1     | FR        | O          | B1K736      | 127:127  | 129:132  | 198:213  | 145:147 | 202:202 | 251:253 | 222:222 |
| 278 | 5  | OLP1     | FR        | O          | B1K737      | 127:127  | 129:132  | 198:213  | 143:145 | 202:202 | 251:253 | 222:222 |
|     |    | OLP1     | FR        | O          | B1K738      |          |          |          |         |         |         |         |
|     |    | OLP1     | FR        | O          | B1K739      |          |          |          |         |         |         |         |
|     |    | OLP1     | FR        | O          | B1K750      |          |          |          |         |         |         |         |
|     |    | OLP1     | FR        | O          | B1K751      |          |          |          |         |         |         |         |
| 279 | 1  | OLP1     | FR        | O          | B1K746      | 127:127  | 129:132  | 198:213  | 143:145 | 202:202 | 251:253 | 216:225 |
| 280 | 3  | OLP1     | FR        | O          | B1K747      | 127:127  | 129:132  | 198:213  | 143:145 | 202:202 | 251:253 | 210:222 |
|     |    | OLP1     | FR        | O          | B1K752      |          |          |          |         |         |         |         |
|     |    | OLP1     | FR        | O          | B1K757      |          |          |          |         |         |         |         |
| 281 | 1  | OLP1     | FR        | O          | B1K748      | 127:127  | 129:132  | 198:213  | 143:145 | 202:202 | 251:253 | 219:222 |
| 282 | 1  | OLP1     | FR        | O          | B1K749      | 127:127  | 129:132  | 198:213  | 143:145 | 202:202 | 251:253 | 213:216 |
| 283 | 2  | OLP1     | FR        | O          | B1K753      | 127:127  | 129:132  | 198:213  | 143:145 | 202:202 | 251:253 | 210:219 |
|     |    | OLP1     | FR        | O          | B1K759      |          |          |          |         |         |         |         |
| 284 | 2  | OLP1     | FR        | O          | B1K754      | 127:127  | 129:132  | 198:213  | 143:145 | 202:202 | 251:253 | 216:222 |
|     |    | OLP1     | FR        | O          | B1K755      |          |          |          |         |         |         |         |

| MLG | n | location | hostplant | plant code | sample code | PhyllI55 | PhyllI30 | PhyllI36 | DV8     | Dvit6   | DVSSR4  | DV4     |
|-----|---|----------|-----------|------------|-------------|----------|----------|----------|---------|---------|---------|---------|
| 285 | 1 | OLP1     | FR        | O          | B1K756      | 127:127  | 129:132  | 198:213  | 143:145 | 202:202 | 251:253 | 219:219 |
| 286 | 1 | OLP1     | FR        | O          | B1K760      | 127:127  | 129:132  | 198:213  | 143:145 | 202:202 | 251:253 | 216:219 |
| 287 | 1 | ERP2     | RH        | K1         | B2K761      | 124:127  | 132:132  | 195:195  | 145:147 | 202:205 | 251:253 | 210:222 |
| 288 | 1 | ERP2     | RH        | K1         | B2K762      | 124:127  | 132:132  | 195:195  | 145:147 | 202:205 | 251:253 | 222:222 |
| 289 | 1 | ERP2     | RH        | K1         | B2K763      | 124:127  | 132:132  | 195:207  | 145:145 | 196:205 | 251:251 | 219:228 |
| 290 | 1 | ERP2     | RH        | K1         | B2K764      | 124:124  | 132:132  | 198:207  | 145:147 | 205:208 | 251:253 | 219:228 |
| 291 | 1 | ERP2     | RH        | K1         | B2K766      | 124:127  | 132:132  | 195:198  | 143:143 | 205:205 | 253:253 | 219:228 |
| 292 | 1 | ERP2     | RH        | K1         | B2K767      | 124:127  | 132:132  | 195:207  | 145:145 | 196:205 | 251:251 | 210:210 |
| 293 | 1 | ERP2     | RH        | K1         | B2K768      | 127:130  | 132:132  | 195:195  | 145:145 | 208:208 | 251:253 | 219:228 |
| 294 | 1 | ERP2     | RH        | K2         | B2K771      | 124:124  | 129:132  | 195:195  | 143:145 | 208:208 | 251:251 | 219:222 |
| 295 | 1 | ERP2     | RH        | K2         | B2K772      | 115:121  | 132:132  | 195:195  | 143:143 | 202:208 | 251:253 | 219:222 |
| 296 | 1 | ERP2     | RH        | K2         | B2K773      | 124:127  | 132:132  | 195:195  | 143:145 | 202:208 | 251:251 | 210:222 |
| 297 | 5 | ERP2     | RH        | K2         | B2K774      | 121:124  | 132:132  | 195:198  | 145:147 | 205:208 | 251:253 | 219:228 |
|     |   | ERP2     | RH        | K2         | B2K776      |          |          |          |         |         |         |         |
|     |   | ERP2     | RH        | K2         | B2K780      |          |          |          |         |         |         |         |
|     |   | ERP2     | RH        | K2         | B2K781      |          |          |          |         |         |         |         |
|     |   | ERP2     | RH        | K2         | B2K783      |          |          |          |         |         |         |         |
| 298 | 1 | ERP2     | RH        | K2         | B2K775      | 121:121  | 132:132  | 195:198  | 143:145 | 208:208 | 251:251 | 219:222 |
| 299 | 2 | ERP2     | RH        | K2         | B2K777      | 121:124  | 132:132  | 195:198  | 145:147 | 205:208 | 251:253 | 210:222 |
|     |   | ERP2     | RH        | K2         | B2K796      |          |          |          |         |         |         |         |
| 300 | 1 | ERP2     | RH        | K2         | B2K779      | 121:127  | 132:132  | 195:195  | 145:147 | 202:208 | 251:253 | 210:222 |
| 301 | 1 | ERP2     | RH        | K2         | B2K782      | 121:127  | 132:132  | 195:195  | 143:145 | 202:205 | 241:251 | 219:228 |
| 302 | 1 | ERP2     | RH        | K2         | B2K784      | 127:130  | 132:132  | 195:207  | 145:145 | 202:208 | 251:251 | 210:222 |
| 303 | 6 | ERP2     | RH        | K2         | B2K785      | 121:124  | 132:132  | 195:198  | 145:147 | 205:208 | 251:253 | 222:222 |
|     |   | ERP2     | RH        | K2         | B2K788      |          |          |          |         |         |         |         |
|     |   | ERP2     | RH        | K2         | B2K791      |          |          |          |         |         |         |         |
|     |   | ERP2     | RH        | K2         | B2K792      |          |          |          |         |         |         |         |
|     |   | ERP2     | RH        | K2         | B2K797      |          |          |          |         |         |         |         |
|     |   | ERP2     | RH        | K2         | B2K800      |          |          |          |         |         |         |         |
| 304 | 2 | ERP2     | RH        | K2         | B2K786      | 121:124  | 132:132  | 195:198  | 145:147 | 205:208 | 251:253 | 219:222 |
|     |   | ERP2     | RH        | K3         | B2K823      |          |          |          |         |         |         |         |
| 305 | 1 | ERP2     | RH        | K2         | B2K787      | 124:124  | 132:132  | 195:195  | 145:147 | 205:208 | 253:253 | 222:222 |
| 306 | 2 | ERP2     | RH        | K2         | B2K789      | 127:130  | 132:132  | 195:195  | 143:145 | 202:208 | 241:241 | 222:222 |
|     |   | ERP2     | RH        | K3         | B2K808      |          |          |          |         |         |         |         |
| 307 | 1 | ERP2     | RH        | K2         | B2K790      | 127:130  | 132:132  | 195:207  | 145:145 | 202:208 | 251:251 | 216:222 |
| 308 | 1 | ERP2     | RH        | K2         | B2K793      | 115:121  | 132:132  | 195:195  | 143:143 | 202:208 | 251:253 | 222:222 |
| 309 | 1 | ERP2     | RH        | K2         | B2K798      | 121:124  | 132:132  | 195:198  | 145:147 | 205:208 | 253:253 | 216:222 |
| 310 | 1 | ERP2     | RH        | K3         | B2K801      | 124:127  | 132:132  | 195:195  | 143:145 | 202:208 | 251:251 | 219:219 |
| 311 | 7 | ERP2     | RH        | K3         | B2K802      | 124:127  | 129:132  | 195:198  | 143:143 | 202:205 | 245:253 | 222:222 |
|     |   | ERP2     | RH        | K3         | B2K803      |          |          |          |         |         |         |         |
|     |   | ERP2     | RH        | K3         | B2K804      |          |          |          |         |         |         |         |
|     |   | ERP2     | RH        | K3         | B2K805      |          |          |          |         |         |         |         |
|     |   | ERP2     | RH        | K3         | B2K807      |          |          |          |         |         |         |         |
|     |   | ERP2     | RH        | K3         | B2K809      |          |          |          |         |         |         |         |
|     |   | ERP2     | RH        | K3         | B2K811      |          |          |          |         |         |         |         |
| 312 | 1 | ERP2     | RH        | K3         | B2K806      | 124:127  | 132:132  | 195:195  | 143:145 | 202:208 | 251:251 | 216:228 |
| 313 | 1 | ERP2     | RH        | K3         | B2K812      | 127:130  | 132:132  | 195:195  | 143:145 | 202:208 | 241:241 | 210:222 |
| 314 | 2 | ERP2     | RH        | K3         | B2K813      | 124:127  | 132:132  | 195:207  | 145:145 | 205:208 | 251:251 | 222:222 |
|     |   | ERP2     | RH        | K3         | B2K815      |          |          |          |         |         |         |         |
| 315 | 1 | ERP2     | RH        | K3         | B2K814      | 124:127  | 132:132  | 195:207  | 145:145 | 205:208 | 251:251 | 222:228 |
| 316 | 1 | ERP2     | RH        | K3         | B2K816      | 124:127  | 129:132  | 195:207  | 143:143 | 202:205 | 245:253 | 222:222 |
| 317 | 1 | ERP2     | RH        | K3         | B2K818      | 124:130  | 132:132  | 195:207  | 143:145 | 202:205 | 241:251 | 216:228 |
| 318 | 1 | ERP2     | RH        | K3         | B2K819      | 124:127  | 129:132  | 195:198  | 143:143 | 202:205 | 245:253 | 216:219 |
| 319 | 1 | ERP2     | RH        | K3         | B2K820      | 124:127  | 129:132  | 195:198  | 143:143 | 202:205 | 245:253 | 210:219 |
| 320 | 1 | ERP2     | RH        | K3         | B2K821      | 124:127  | 129:132  | 195:198  | 143:143 | 202:205 | 245:253 | 210:222 |
| 321 | 1 | ERP2     | RH        | K3         | B2K822      | 124:127  | 129:132  | 195:198  | 143:143 | 202:205 | 245:253 | 216:228 |
| 322 | 1 | ERP1     | RH        | K1         | B1K825      | 124:124  | 132:132  | 195:207  | 143:145 | 202:208 | 245:255 | 222:222 |
| 323 | 2 | ERP1     | RH        | K1         | B1K826      | 127:127  | 132:132  | 195:207  | 143:145 | 202:208 | 251:255 | 222:222 |
|     |   | ERP1     | RH        | K1         | B1K832      |          |          |          |         |         |         |         |
| 324 | 1 | ERP1     | RH        | K1         | B1K829      | 124:127  | 132:132  | 195:207  | 145:147 | 202:208 | 241:255 | 222:222 |
| 325 | 2 | ERP1     | RH        | K1         | B1K830      | 124:130  | 120:132  | 195:195  | 145:147 | 202:202 | 251:253 | 222:222 |
|     |   | ERP1     | RH        | K1         | B1K831      |          |          |          |         |         |         |         |
| 326 | 1 | ERP1     | RH        | K1         | B1K833      | 124:127  | 132:132  | 195:195  | 145:147 | 202:202 | 245:251 | 222:222 |
| 327 | 1 | ERP1     | RH        | K1         | B1K834      | 127:127  | 120:120  | 195:195  | 145:147 | 202:202 | 251:253 | 222:222 |
| 328 | 2 | ERP1     | RH        | K1         | B1K835      | 121:127  | 132:132  | 195:195  | 143:143 | 202:208 | 245:251 | 222:222 |
|     |   | ERP1     | RH        | K1         | B1K837      |          |          |          |         |         |         |         |
| 329 | 1 | ERP1     | RH        | K1         | B1K836      | 124:127  | 132:132  | 195:195  | 147:147 | 202:202 | 245:253 | 222:222 |
| 330 | 1 | ERP1     | RH        | K1         | B1K838      | 127:127  | 120:132  | 195:195  | 145:145 | 202:205 | 253:253 | 222:222 |
| 331 | 1 | ERP1     | RH        | K1         | B1K839      | 124:124  | 132:132  | 195:195  | 143:145 | 202:205 | 251:253 | 210:222 |
| 332 | 2 | ERP1     | RH        | K1         | B1K840      | 124:127  | 132:132  | 195:207  | 145:147 | 202:208 | 241:255 | 219:222 |
|     |   | ERP1     | RH        | K2         | B1K857      |          |          |          |         |         |         |         |
| 333 | 1 | ERP1     | RH        | K1         | B1K841      | 127:127  | 120:132  | 195:195  | 145:147 | 202:202 | 245:243 | 210:210 |



| MLG | n | location | hostplant | plant code | sample code | PhyllI55 | PhyllI30 | PhyllI36 | DV8     | Dvit6   | DVSSR4  | DV4     |
|-----|---|----------|-----------|------------|-------------|----------|----------|----------|---------|---------|---------|---------|
| 334 | 2 | ERP1     | RH        | K1         | B1K842      | 124:124  | 132:132  | 195:195  | 145:147 | 202:208 | 245:251 | 210:216 |
|     |   | ERP1     | RH        | K1         | B1K843      |          |          |          |         |         |         |         |
| 335 | 1 | ERP1     | RH        | K1         | B1K844      | 124:127  | 132:132  | 195:195  | 147:147 | 202:202 | 245:253 | 213:216 |
| 336 | 1 | ERP1     | RH        | K1         | B1K845      | 121:127  | 132:132  | 195:195  | 143:145 | 202:202 | 245:253 | 219:222 |
| 337 | 1 | ERP1     | RH        | K1         | B1K846      | 127:127  | 120:132  | 195:195  | 145:145 | 202:205 | 253:253 | 210:222 |
| 338 | 1 | ERP1     | RH        | K1         | B1K847      | 127:127  | 132:132  | 195:207  | 143:145 | 202:208 | 251:255 | 210:219 |
| 339 | 2 | ERP1     | RH        | K1         | B1K848      | 124:127  | 132:132  | 195:195  | 143:145 | 202:205 | 241:251 | 210:222 |
|     |   | ERP1     | RH        | K1         | B1K849      |          |          |          |         |         |         |         |
| 340 | 3 | ERP1     | RH        | K2         | B1K851      | 124:124  | 132:132  | 195:204  | 147:147 | 202:202 | 241:253 | 219:222 |
|     |   | ERP1     | RH        | K2         | B1K859      |          |          |          |         |         |         |         |
|     |   | ERP1     | RH        | K2         | B1K866      |          |          |          |         |         |         |         |
| 341 | 3 | ERP1     | RH        | K2         | B1K852      | 121:124  | 132:132  | 195:195  | 145:145 | 202:202 | 251:251 | 210:222 |
|     |   | ERP1     | RH        | K2         | B1K867      |          |          |          |         |         |         |         |
|     |   | ERP1     | RH        | K2         | B1K871      |          |          |          |         |         |         |         |
| 342 | 1 | ERP1     | RH        | K2         | B1K854      | 127:130  | 120:132  | 195:210  | 145:145 | 196:202 | 251:251 | 219:222 |
| 343 | 1 | ERP1     | RH        | K2         | B1K855      | 124:127  | 132:132  | 195:195  | 143:145 | 205:208 | 251:253 | 219:222 |
| 344 | 1 | ERP1     | RH        | K2         | B1K856      | 124:127  | 120:132  | 195:195  | 145:147 | 205:208 | 245:253 | 210:219 |
| 345 | 1 | ERP1     | RH        | K2         | B1K858      | 124:127  | 132:132  | 195:195  | 143:145 | 202:208 | 245:251 | 210:219 |
| 346 | 1 | ERP1     | RH        | K2         | B1K860      | 124:130  | 132:132  | 195:207  | 145:145 | 202:208 | 251:251 | 210:222 |
| 347 | 4 | ERP1     | RH        | K2         | B1K861      | 124:127  | 132:132  | 195:195  | 145:145 | 202:205 | 245:253 | 210:222 |
|     |   | ERP1     | RH        | K2         | B1K864      |          |          |          |         |         |         |         |
|     |   | ERP1     | RH        | K2         | B1K865      |          |          |          |         |         |         |         |
|     |   | ERP1     | RH        | K2         | B1K872      |          |          |          |         |         |         |         |
| 348 | 2 | ERP1     | RH        | K2         | B1K868      | 124:124  | 132:132  | 195:204  | 143:145 | 202:205 | 245:255 | 222:222 |
|     |   | ERP1     | RH        | K2         | B1K874      |          |          |          |         |         |         |         |
| 349 | 1 | ERP1     | RH        | K2         | B1K870      | 127:127  | 132:132  | 195:195  | 143:147 | 208:208 | 251:251 | 222:222 |
| 350 | 5 | Pf L     | Vin       | 6/62       | Pf879       | 124:130  | 132:132  | 195:195  | 145:145 | 202:208 | 253:253 | 210:216 |
|     |   | Pf L     | Vin       | 6/62       | Pf880       |          |          |          |         |         |         |         |
|     |   | Pf L     | Vin       | 6/62       | Pf881       |          |          |          |         |         |         |         |
|     |   | Pf L     | Vin       | 6/62       | Pf882       |          |          |          |         |         |         |         |
|     |   | Pf L     | Vin       | 6/62       | Pf883       |          |          |          |         |         |         |         |
